# Supplementary material
Source: publisher site journal article supplement (https://www.dovepress.com/article/422857)
Supplement: Supplementary file 1 [file get_supplementary_file.php]

**Supplementary Table 1** Characteristics of the included study

| No. | Title | Acupuncture technique method | Relevant variables or factors | Corresponding results |
| --- | --- | --- | --- | --- |
|  |  |  |  |  |

**Supplementary Table 2** Frequency of acupoint application for PS treatment

| No. | Acupoint | Frequency (%) |
| --- | --- | --- |
|  |  |  |

**Supplementary Table 3** Frequency of meridian application for PS treatment

| Meridian | Frequency (%) | Amount (%) | Acupoints |
| --- | --- | --- | --- |
|  |  |  |  |

**Supplementary Table 4** Frequency of site of points application for PS treatment

| Site of points | Frequency (%) | Amount (%) | Acupoints |
| --- | --- | --- | --- |
|  |  |  |  |

**Supplementary Table 5** Frequency of Specific point for PS treatment

| Specific point | Frequency (%) | Amount (%) | Acupoints |
| --- | --- | --- | --- |
|  |  |  |  |

**Supplementary Table 6** Association rules of acupoints for PS treatment

| NO. | Latteritem | Formeritem | Frequency | Support (%) | Confidence (%) | Lift |
| --- | --- | --- | --- | --- | --- | --- |
|  |  |  |  |  |  |  |
